# Supplementary material
Source: HighWire-hosted journal article supplement (https://www.life-science-alliance.org/content/6/7/e202301950/F7)

# Original source data Figure 4E

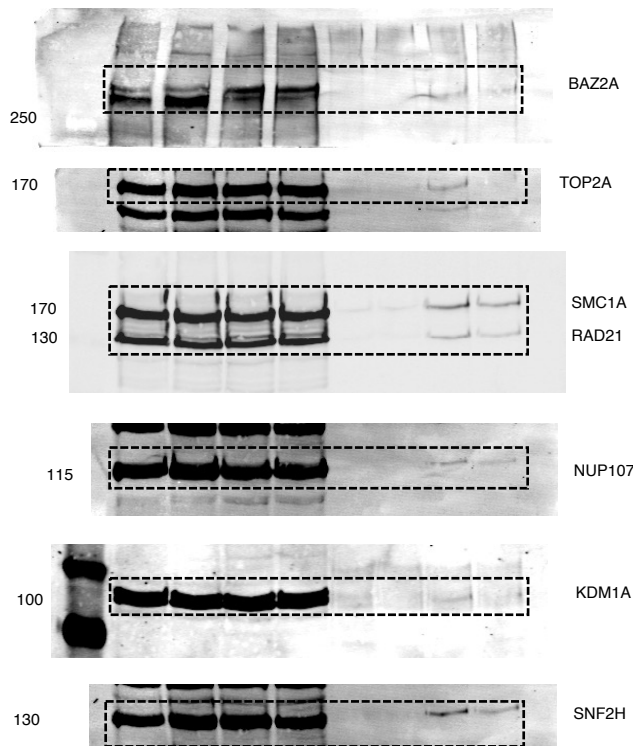

Supplement: inline-supplementary-material-8 [file inline-supplementary-material-8.pdf]
